# Supplementary material for: Impact of OsBadh2 Mutations on Salt Stress Response in Rice
Source: MDPI journal article supplement (doi:10.3390/plants11212829), 2022-10-24
Supplement: s1 [file s1]

**Supplementary Table S1:** List of primers used in this study.

| Name of Primer   | Gene ID/Name   | Sequence                 | Remarks                                                |
|------------------|----------------|--------------------------|--------------------------------------------------------|
| BADH2.7PCRF      | LOC_Os08g32870 | CTTGTTTGGAGCTTGCTGATG    | <i>OsBadh2</i> gene sequence                           |
| BADH2.7PCR       |                | AGTGAAACAGGCTGTCAAGAA    |                                                        |
| BAD2SgF          |                | GGCAGACTAGAGACGCTTGATTGT | <i>OsBadh2</i> gene guideRNA                           |
| BAD2SgR          |                | AAACACAATCAAGCGTCTCTAGTC |                                                        |
| Hyg-F            |                | AGAAGAAGATGTTGGCGACCT    | Hygromycin marker primer                               |
| Hyg-R            |                | GTCCTGCGGGTAAATAGCT      |                                                        |
| Vec-seq F        | PHUN4c12       | GCCCATTACGCAATTGGACG     | To confirm oligos insertion in pHUN4c12 RTqPCR primers |
| Vec-seq R        |                | CAAGGACGACGGCAACTACA     |                                                        |
| <i>OsBadh1F</i>  | LOC_Os04g39020 | CCACGGAGGCAACCATC        |                                                        |
| <i>OsBadh1R</i>  |                | CCTTGAGGTACTTGGCCC       |                                                        |
| <i>OsBadh2F</i>  | LOC_Os08g32870 | CTTGTTTGGAGCTTGCTGATG    |                                                        |
| <i>OsBadh2R</i>  |                | CATAACTCCCAGTAAATGCAACC  |                                                        |
| <i>OsP5CS1F</i>  | LOC_Os05g38150 | CAAGATGGAAGATTGGCTTTGG   |                                                        |
| <i>OsP5CS1R</i>  |                | GTACCTAAGTCGCTGTCTGC     |                                                        |
| <i>OsP5CS2F</i>  | LOC_Os01g62900 | TGCTGTTGGTGTGGGAG        |                                                        |
| <i>OsP5CS2R</i>  |                | AACGTGTCATAGATCGCCATC    |                                                        |
| <i>OsGAD1F</i>   | LOC_Os08g36320 | CTGATGCTGGACGGGAAC       |                                                        |
| <i>OsGAD1R</i>   |                | TCCATGTCGACGTAGTTCTTG    |                                                        |
| <i>OsGAD2F</i>   | LOC_Os04g37500 | ACAAGAACTACGCCGACATG     |                                                        |
| <i>OsGAD2R</i>   |                | CATTGAACAGCCTCGCTATG     |                                                        |
| <i>OsGAD3F</i>   | LOC_Os03g13300 | CGTCTCCGAGAGTGACATG      |                                                        |
| <i>OsGAD3R</i>   |                | TTGCCGTCCAGCATCAG        |                                                        |
| <i>OsGAD4F</i>   | LOC_Os03g51080 | CACTCCACGTTCGCCTC        |                                                        |
| <i>OsGAD4R</i>   |                | TTGCCGTCCAGCATCAG        |                                                        |
| <i>OsNAC3F</i>   | LOC_Os07g12340 | GAAGAACGAGTGGGAGAAGATG   |                                                        |
| <i>OsNAC3R</i>   |                | GCGAGCATGGAGAGGTC        |                                                        |
| <i>OsMYB30F</i>  | LOC_Os02g41510 | GTGGATCAACTACCTCCGC      |                                                        |
| <i>OsMYB30R</i>  |                | TTCTTGATCTCGTTGTCCGTC    |                                                        |
| <i>OsDREB1CF</i> | LOC_Os06g03670 | CAAGTTCAGGGAGACGAGG      |                                                        |
| <i>OsDREB1CR</i> |                | AGATGCGGGACTTCTTGTTG     |                                                        |
| <i>OsERF068F</i> | LOC_Os01g21120 | TCATCTACGACTACATCCCGG    |                                                        |
| <i>OsERF068R</i> |                | GTTCTTCCGCTCCCTCTTC      |                                                        |
| <i>OsHAK5F</i>   | LOC_Os01g70490 | CCAAAGCCATACAGCCAAG      |                                                        |
| <i>OsHAK5R</i>   |                | TCCTTGATCCCGTTGGTAAAG    |                                                        |
| <i>ActinF</i>    | LOC_Os08g28190 | CGTGAATACCAGCTAGGACTTG   |                                                        |
| <i>ActinR</i>    |                | TCAGGAGCTTGAAACCGTTC     |                                                        |
